# Supplementary material
Source: Springer Nature journal article supplement (https://www.springermedizin.de/resource/supplementary/12906_2013_1632_MOESM11_ESM.pdf/9523110)

## Triglyceride (TG)

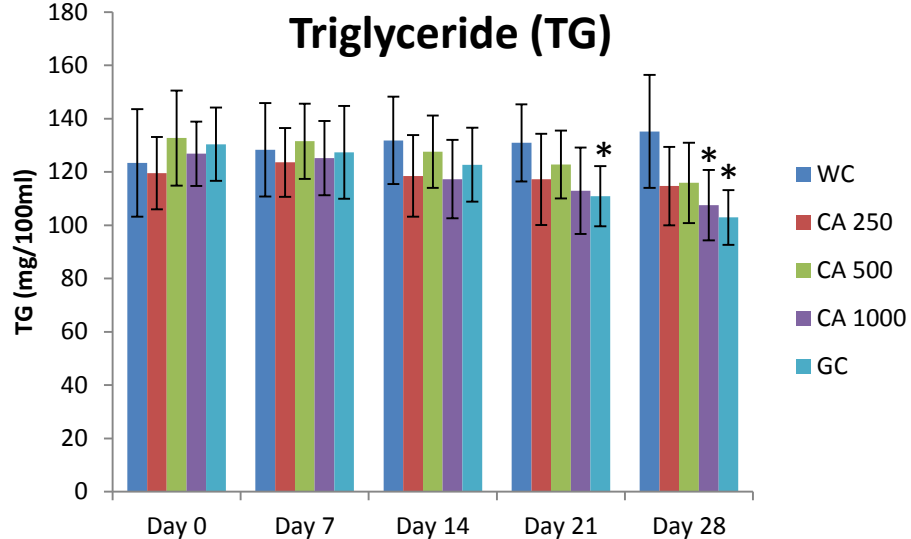

## Cholesterol

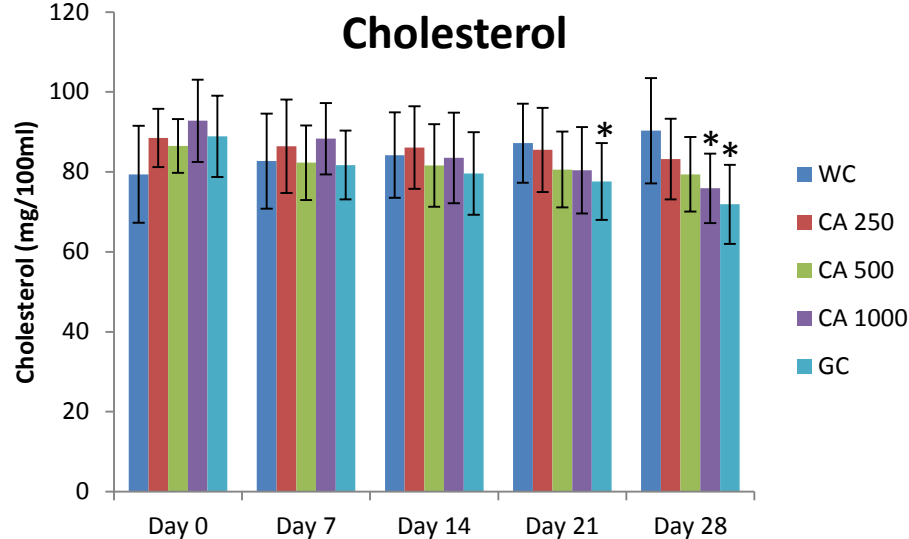

## High Density Lipoprotein (HDL)

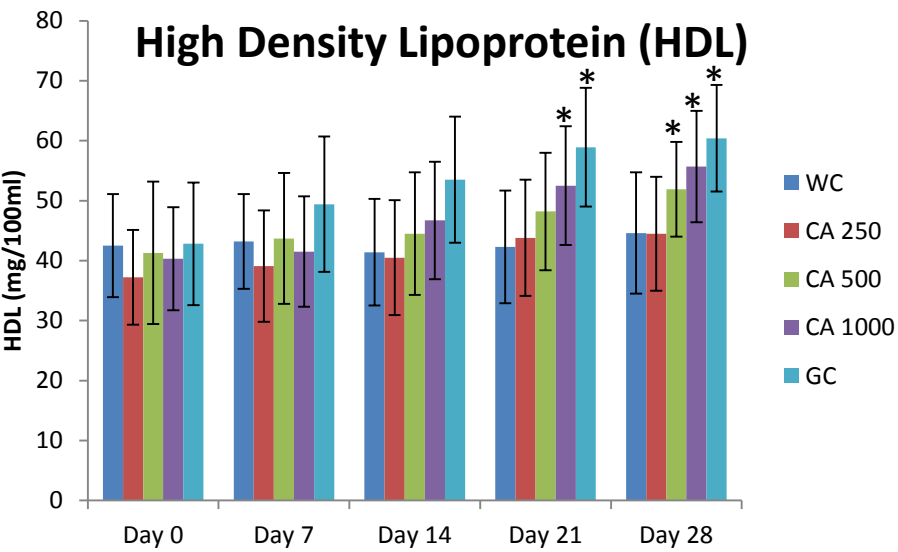

## Low Density Lipoprotein (LDL)

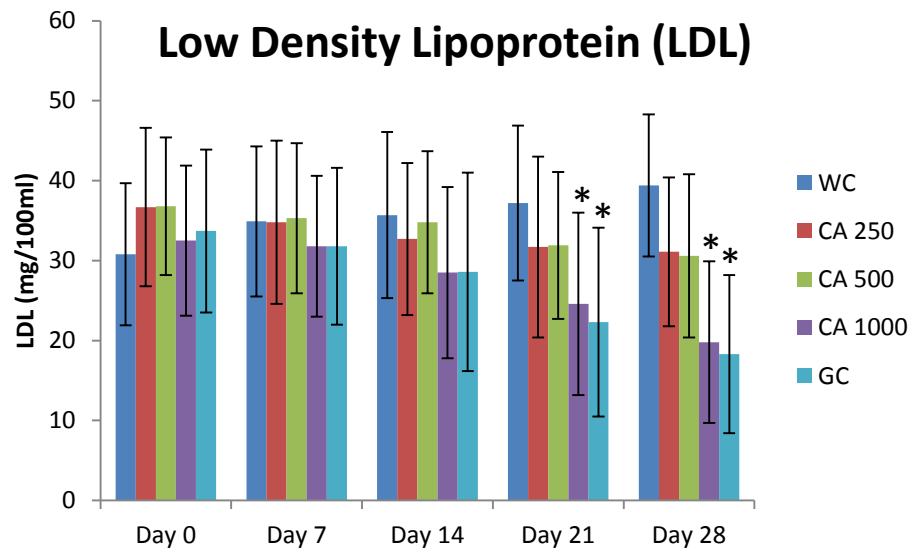

Supplement: MOESM11 [file 9523110]
